# Supplementary material for: Diversification of hydrothermal reaction products induced by temperature: syntheses, structures and properties of four La(iii)–Cu(ii) metal frameworks constructed from rod-shaped molecular building blocks
Source: Royal Society of Chemistry journal article supplement (doi:10.1039/b806502k), 2008-01-01
Supplement: b806502k.pdf [file b806502k.pdf]

**Diversification of Hydrothermal Reaction Products Induced by Temperature, Syntheses, Structures, and Properties of Four La(III)-Cu(II) Metal Frameworks Constructed from Rod-Shaped Molecular Building Blocks**

Junwei Ye\*<sup>a</sup>, Jingying Zhang<sup>b</sup>, Ling Ye<sup>b</sup>, Dong Xie<sup>a</sup>, Tao Xu<sup>a</sup>, Gang Li, Guiling Ning\*<sup>a</sup>

<sup>a</sup> *State Key Laboratory of Fine Chemicals, School of Chemical Engineering, Dalian University of Technology, 158 Zhongshan Road, Dalian 116012, P. R. China*

<sup>b</sup> *State key laboratory of supramolecular structure and materials, Jilin University, College of Chemistry, Jilin University, Changchun 130012, P. R. China*

\*To whom correspondence should be addressed. Fax: +86-411-88993609, E-mail: [junweiye@dlut.edu.cn](mailto:junweiye@dlut.edu.cn) (J. Ye); E-mail: [ninggl@dlut.edu.cn](mailto:ninggl@dlut.edu.cn) (G. Ning).

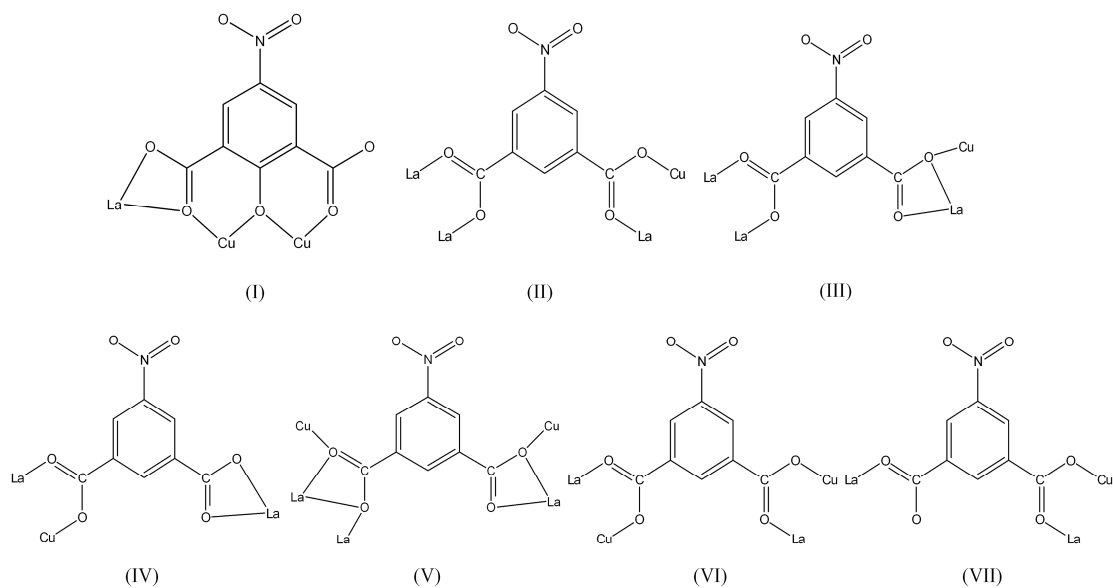

Scheme S1 Schematic representation of the coordination modes of NIPH ligands in compounds **1-4**. Mode I and II for **1**, Mode III and IV for **2**, Mode II and V for **3**, Mode IV, VI and VII for **4**.

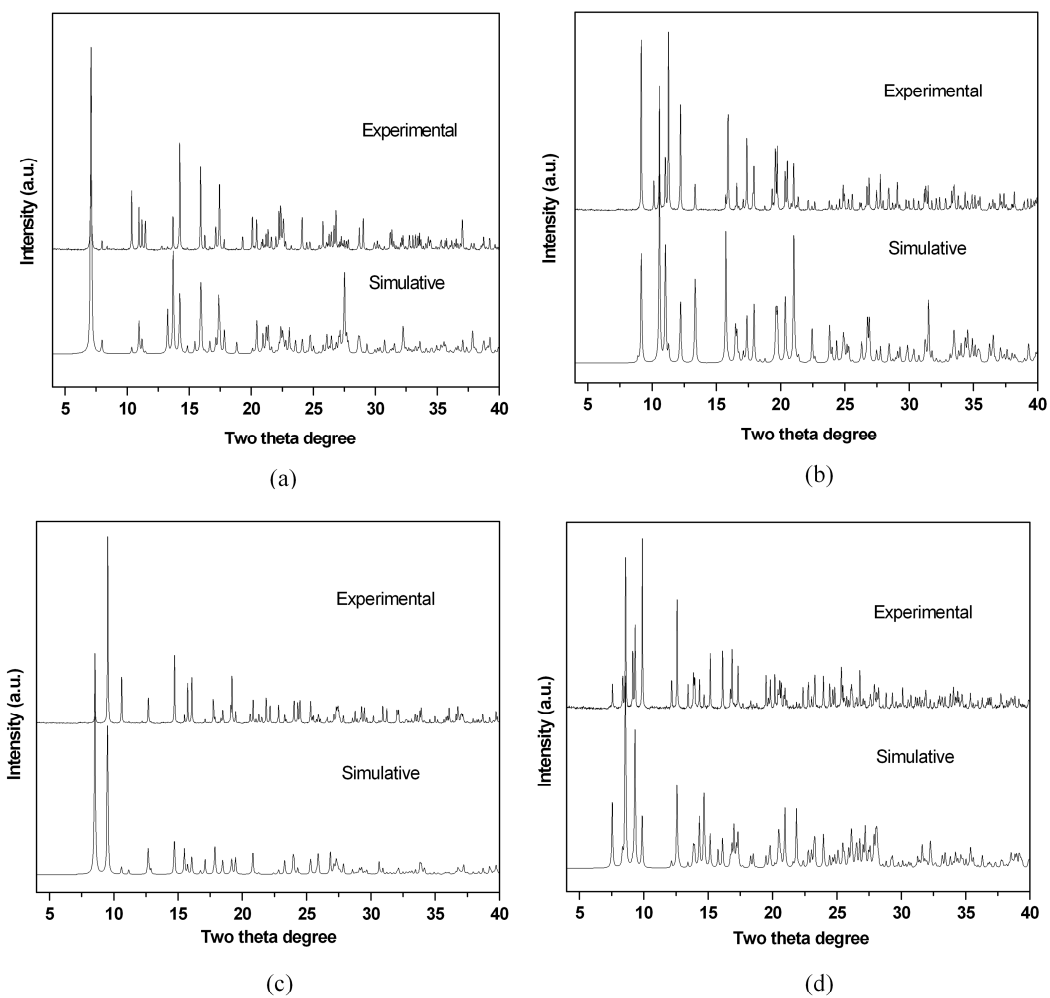

Fig. S1 Experimental and simulated powder X-ray diffraction patterns of **1** (a), **2** (b), **3** (c) and **4** (d).

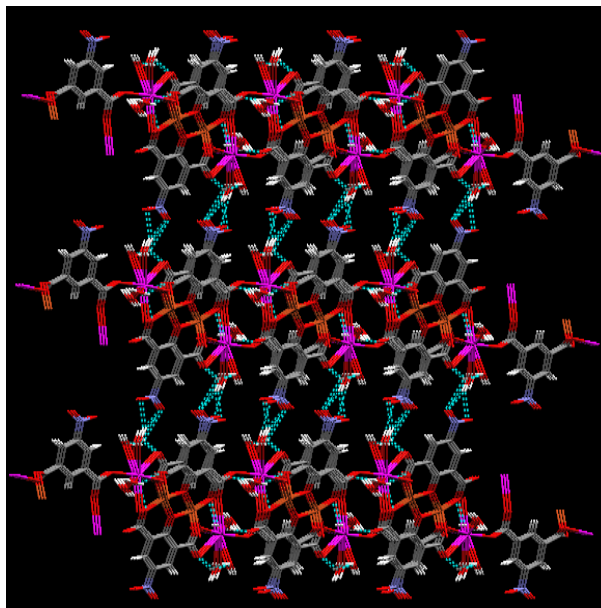

Fig. S2 Perspective view of the hydrogen-bond interactions and three-dimensional network in **1**.

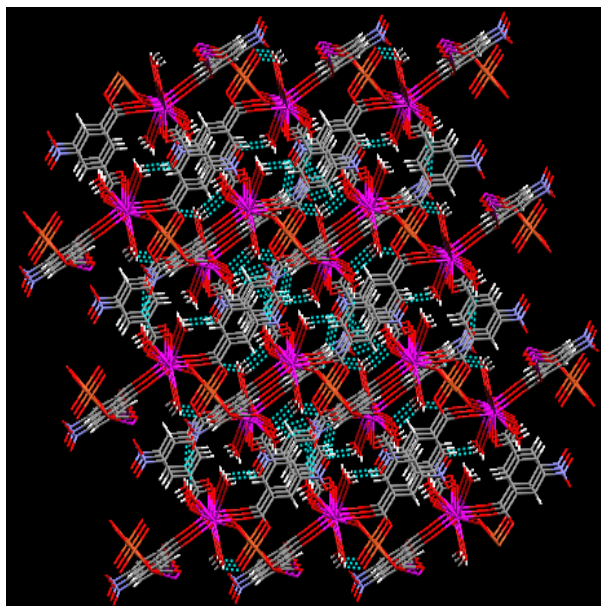

Fig. S3 Perspective view of the hydrogen-bond interactions and three-dimensional network in **2**.

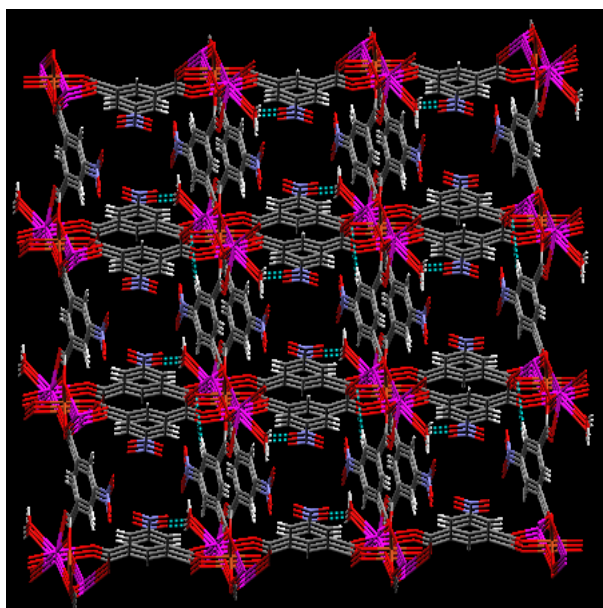

Fig. S4 Perspective view of the hydrogen-bond interactions and three-dimensional network in **3**.

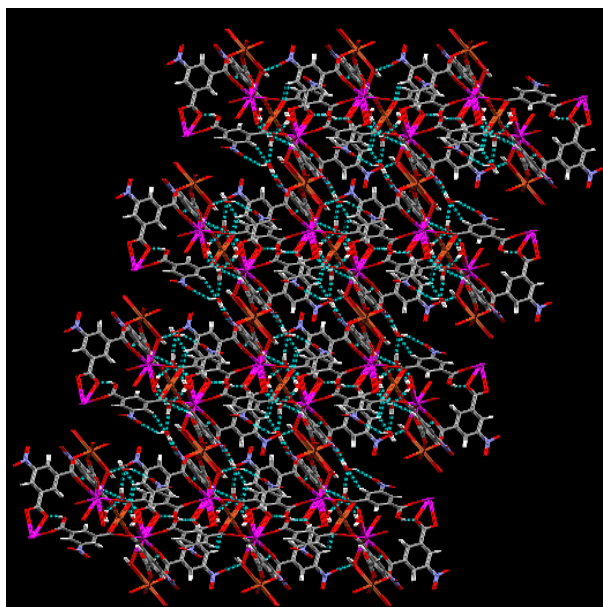

Fig. S5 Perspective view of the hydrogen-bond interactions and three-dimensional network in **4**.

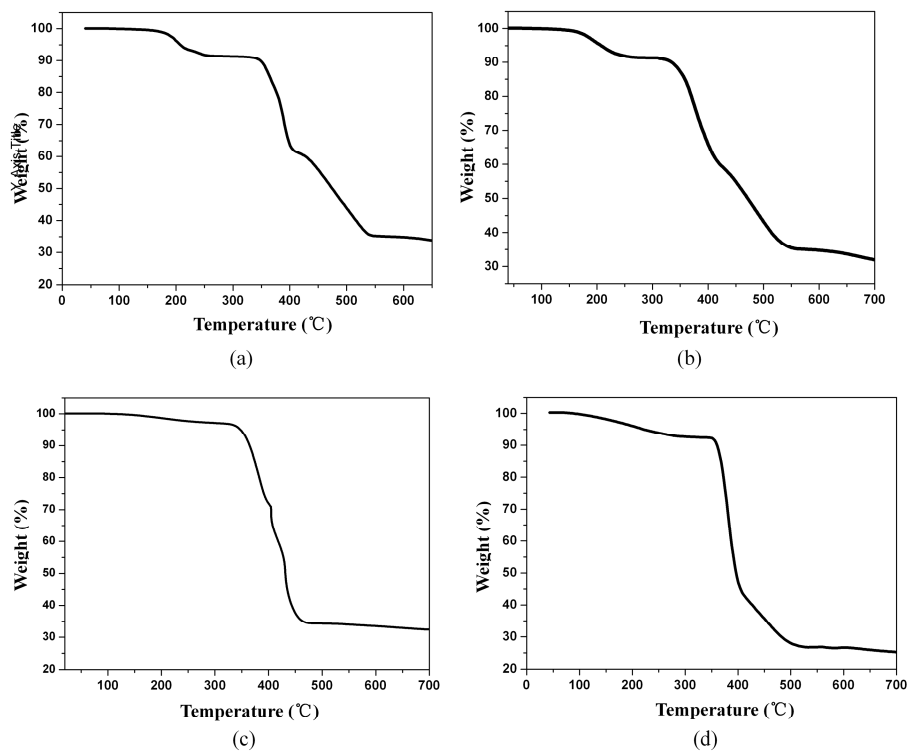

Fig. S6 Thermogravimetric curve for (a) 1, (b) 2, (c) 3, (d) 4.

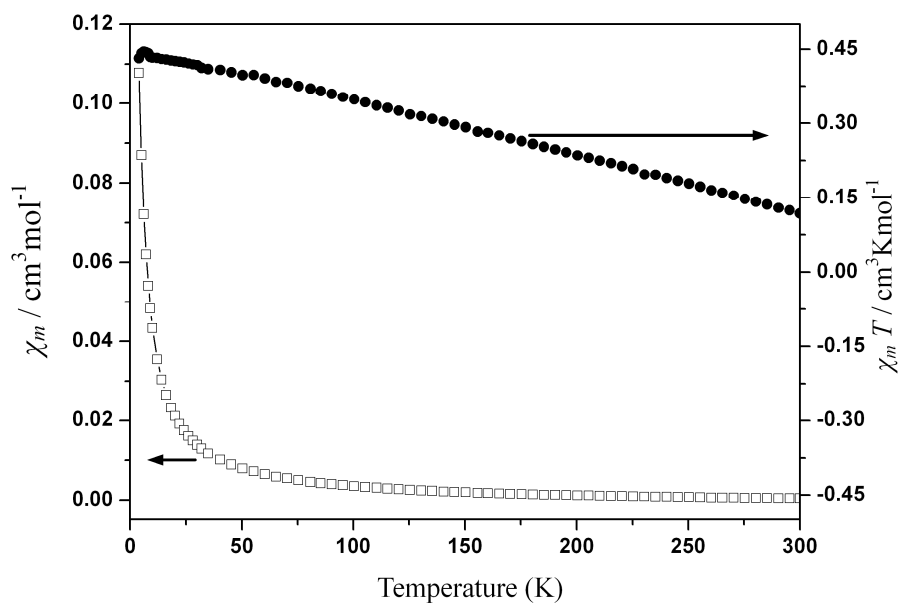

Fig. S7 Temperature variation of the magnetic susceptibility  $\chi_m$  and  $\chi_m T$  for **4**.

Table S1 Hydrogen bonds for **1-4** [Å and °]

| D-H...A                             | d(D-H)    | d(H...A)  | d(D...A)   | <(DHA)    |
|-------------------------------------|-----------|-----------|------------|-----------|
| <b>1</b>                            |           |           |            |           |
| O(15)-H(15A)...O(18)                | 0.82      | 2.03      | 2.847(6)   | 172.0     |
| O(17)-H(17B)...O(10) <sup>#1</sup>  | 0.889(17) | 2.06(3)   | 2.833(4)   | 144(4)    |
| O(14)-H(14A)...O(3) <sup>#2</sup>   | 0.82      | 1.87      | 2.684(4)   | 174.8     |
| O(14)-H(14B)...O(4) <sup>#3</sup>   | 0.902(18) | 2.12(3)   | 2.814(5)   | 133(3)    |
| O(15)-H(15B)...O(5) <sup>#3</sup>   | 0.895(18) | 2.42(3)   | 3.033(6)   | 126(3)    |
| O(17)-H(17A)...O(4) <sup>#4</sup>   | 0.82      | 2.05      | 2.761(4)   | 145.3     |
| O(16)-H(16A)...O(18) <sup>#5</sup>  | 0.82      | 2.15      | 2.935(6)   | 159.4     |
| O(18)-H(18B)...O(6) <sup>#6</sup>   | 0.901(17) | 2.38(3)   | 3.111(6)   | 139(4)    |
| O(17)-H(17B)...O(3) <sup>#7</sup>   | 0.889(17) | 2.53(4)   | 3.190(5)   | 131(3)    |
| O(16)-H(16B)...O(12) <sup>#8</sup>  | 0.885(18) | 2.07(2)   | 2.832(6)   | 144(3)    |
| <b>2</b>                            |           |           |            |           |
| O(13)-H(13B)...O(9) <sup>#1</sup>   | 0.663(13) | 2.513(13) | 2.8565(16) | 114.9(13) |
| O(14)-H(14A)...O(7) <sup>#2</sup>   | 0.773(14) | 2.186(12) | 2.7841(14) | 134.7(10) |
| O(14)-H(14B)...O(10) <sup>#3</sup>  | 0.852(11) | 1.978(11) | 2.8246(17) | 172.1(13) |
| O(15)-H(15A)...O(5) <sup>#4</sup>   | 0.657(12) | 2.325(12) | 2.9801(16) | 174.3(15) |
| O(13)-H(13A)...O(11) <sup>#5</sup>  | 0.735(10) | 2.232(11) | 2.9638(18) | 173.3(14) |
| O(15)-H(15B)...O(6) <sup>#6</sup>   | 0.765(11) | 2.176(12) | 2.9366(16) | 172.5(14) |
| <b>3</b>                            |           |           |            |           |
| O(13)-H(13A)...O(11) <sup>#1</sup>  | 0.82      | 2.15      | 2.945(14)  | 162.1     |
| <b>4</b>                            |           |           |            |           |
| O(20)-H(20B)...O(13)                | 0.789(18) | 2.24(4)   | 2.951(7)   | 151(7)    |
| O(20)-H(20A)...O(10) <sup>#1</sup>  | 0.81(8)   | 2.56(8)   | 2.986(7)   | 115(6)    |
| O(21)-H(21B)...O(4) <sup>#3</sup>   | 0.79(8)   | 2.20(8)   | 2.834(7)   | 137(7)    |
| O(21)-H(21A)...O(22) <sup>#4</sup>  | 0.87(8)   | 1.98(8)   | 2.813(9)   | 160(7)    |
| C(12)-H(12)...O(2) <sup>#4</sup>    | 0.76(8)   | 2.70(8)   | 3.443(7)   | 169(7)    |
| O(20)-H(20A)...O(5) <sup>#5</sup>   | 0.81(8)   | 2.25(8)   | 2.898(7)   | 137(7)    |
| O(22)-H(22A)...O(18) <sup>#6</sup>  | 0.89(8)   | 2.17(8)   | 2.976(11)  | 151(7)    |
| O(15)-H(15A)...O(3) <sup>#7</sup>   | 0.89(8)   | 1.71(8)   | 2.574(6)   | 165(7)    |
| C(10)-H(10)...O(21) <sup>#8</sup>   | 0.94(8)   | 2.41(8)   | 3.303(7)   | 160(6)    |
| O(19)-H(19B)...O(21) <sup>#8</sup>  | 0.79(8)   | 2.11(8)   | 2.841(8)   | 155(8)    |
| O(22)-H(22B)...N(2) <sup>#9</sup>   | 1.05(8)   | 2.61(8)   | 3.632(8)   | 164(6)    |
| O(22)-H(22B)...O(11) <sup>#9</sup>  | 1.05(8)   | 1.78(8)   | 2.825(8)   | 172(6)    |
| O(19)-H(19A)...O(21) <sup>#10</sup> | 0.68(8)   | 2.07(8)   | 2.737(7)   | 166(9)    |

Symmetry transformations used to generate equivalent atoms: For **1**: #1 x,y-1,z; #2 -x,-y+1,-z+1; #3 x,y+1,z; #4 x+1,y+1,z; #5 x+1,y,z; #6 -x+1,-y+1,-z+2; #7 -x+1,-y+1,-z+1; #8 -x+2,-y+2,-z+2. For **2**: #1 -x+1,-y+2,-z+1; #2 -x+1,-y+1,-z+2; #3 x+1,y-1,z; #4 x-1,y+1,z; #5 -x,-y+2,-z+2; #6 -x+3,-y+1,-z+1. For **3**: #1 x, y+1, z-1. For **4**: #1 x+1,y,z; #2 x,y+1,z; #3 -x+1,-y+2,-z+1; #4 x-1,y,z; #5 x,y-1,z; #6 -x+1,-y+1,-z+1; #7 -x+1,-y+1,-z; #8 -x,-y+1,-z+1; #9 x+1,y-1,z; #10 x,y,z-1.
